# Supplementary material for: Thermal control of the defunctionalization of supported Au25(glutathione)18 catalysts for benzyl alcohol oxidation
Source: publisher site journal article supplement (doi:10.3762/bjnano.10.21), 2019-01-18
Supplement: Additional file 1 [file 2190-4286-10-21-S1.pdf]

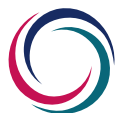

## Supporting Information

for

### **Thermal control of the defunctionalization of supported Au<sub>25</sub>(glutathione)<sub>18</sub> catalysts for benzyl alcohol oxidation**

Zahraa Shahin, Hyewon Ji, Rodica Chiriac, Nadine Essayem, Franck Rataboul and Aude Demessence

*Beilstein J. Nanotechnol.* **2019**, *10*, 228–237. [doi:10.3762/bjnano.10.21](https://doi.org/10.3762/bjnano.10.21)

## Additional experimental results

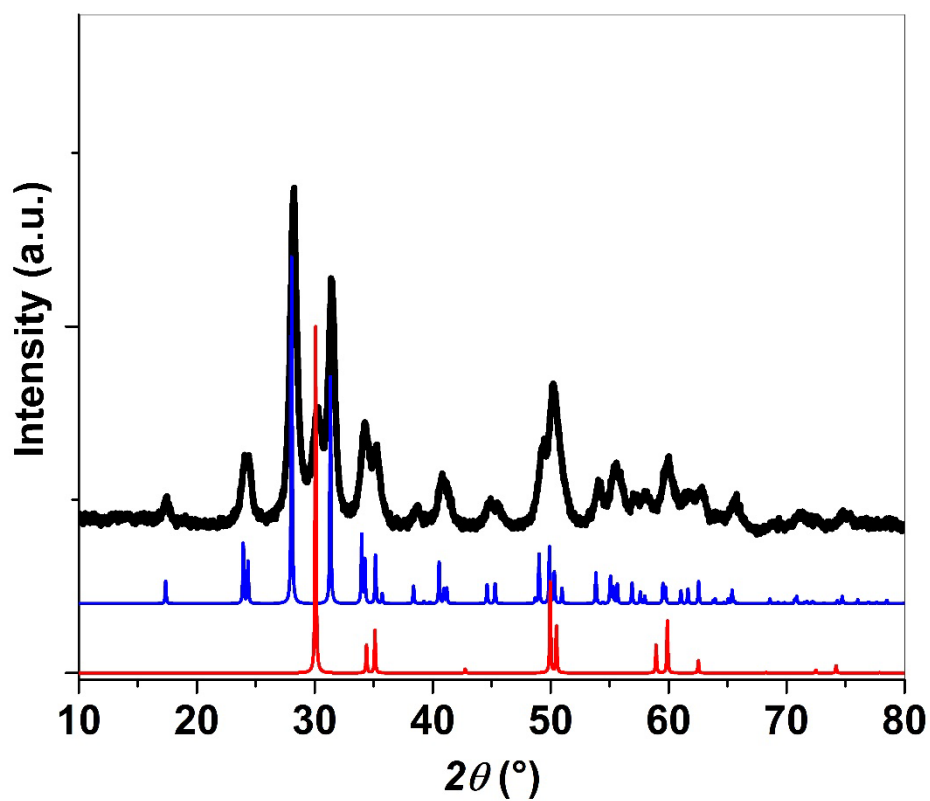

**Figure S1:** Powder X-ray diffraction patterns of synthesized  $ZrO_2$  (black) and simulated monoclinic (blue) and tetragonal (red) phases of  $ZrO_2$ .

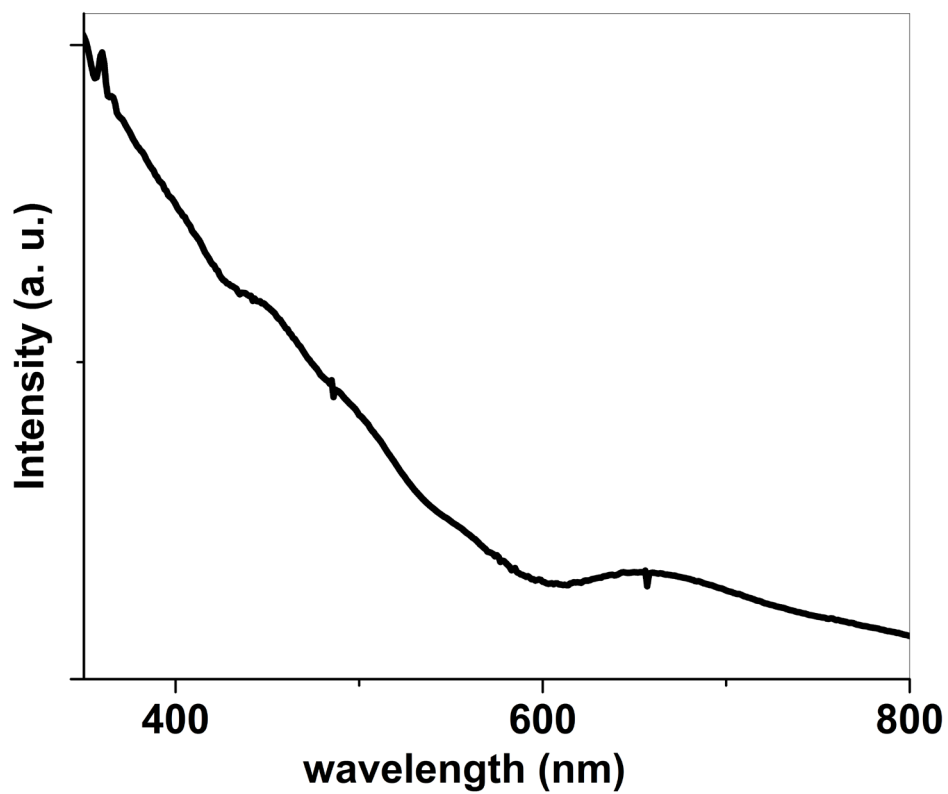

**Figure S2:** UV-vis spectrum of  $Au_{25}(SG)_{18}$  in water.

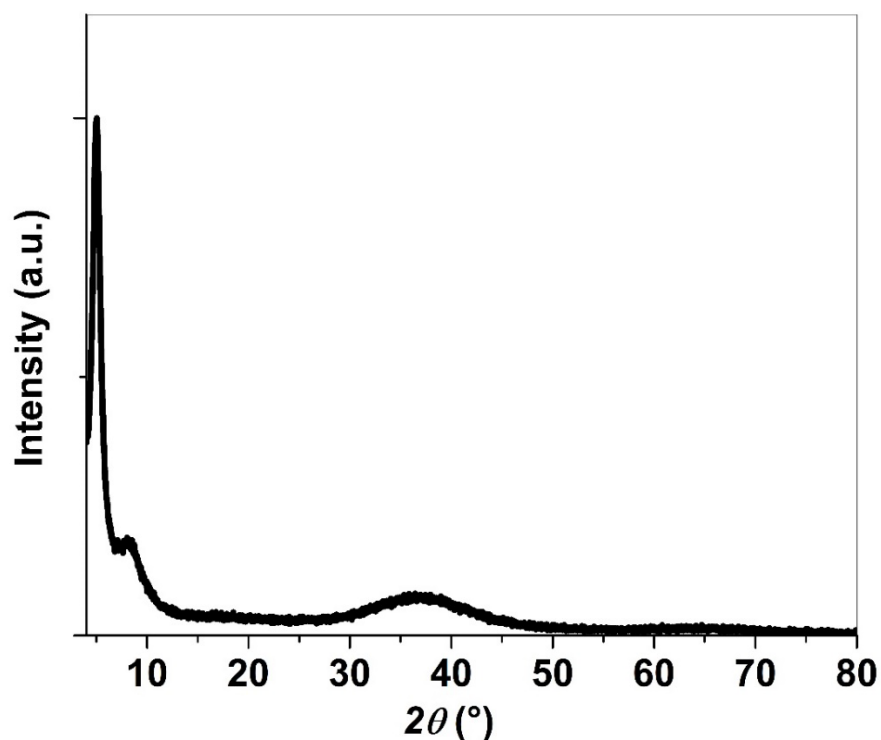

**Figure S3:** Powder X-ray diffraction pattern of  $\text{Au}_{25}(\text{SG})_{18}$ . The intense reflection at  $2\theta = 5.01^\circ$  corresponds to a center-to-center clusters distance of 1.76 nm by applying the Bragg's law [S1].

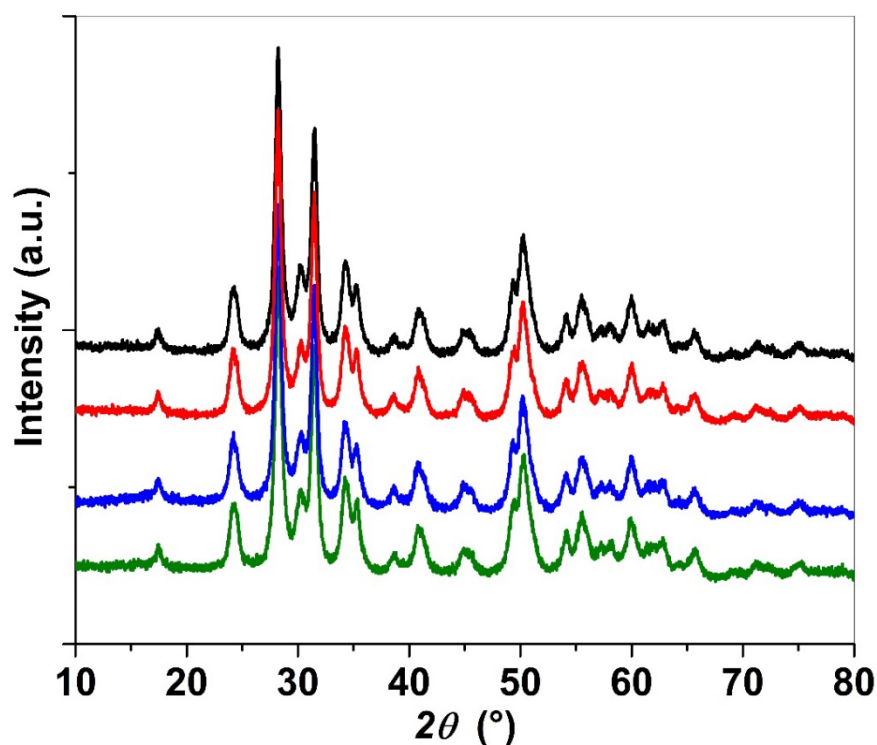

**Figure S4:** Powder X Ray diffraction patterns of  $\text{Au}_{25}(\text{SG})_{18}@\text{ZrO}_2$  after calcination at  $400^\circ\text{C}$  for 12 hours under air (red), calcination at  $300^\circ\text{C}$  for 4 hours under air (blue), calcination at  $200^\circ\text{C}$  for 4 hours under air (green), and  $\text{ZrO}_2$  support alone (black).

[S1] Lavenn, C.; Albriex, F.; Bergeret, G.; Chiriac, R.; Delichère, P.; Tuel, A.; Demessence, A. *Nanoscale* **2012**, *4*, 7334.
